# Supplementary material for: Comparative study of the extracellular proteome of Sulfolobus species reveals limited secretion
Source: PubMed Central journal article supplement — Extremophiles. 2009 Dec 2;14(1):87–98. doi: 10.1007/s00792-009-0290-y (PMC2797410; doi:10.1007/s00792-009-0290-y), 2009-12-02
Supplement: 792_2009_290_MOESM1_ESM.pdf [file 792_2009_290_MOESM1_ESM.pdf]

**Table 1S.** Summary of statistical data of the mass spectrometry analysis

| IN GEL/MS              | Calc. Mass (dalton) | Obsrv. Mass (dalton) | Start     | End | Sequence | Modification              | Protein MW (dalton) | Protein Score | Protein Score C.I. (%) |        |
|------------------------|---------------------|----------------------|-----------|-----|----------|---------------------------|---------------------|---------------|------------------------|--------|
| <b>Medium fraction</b> |                     |                      |           |     |          |                           |                     |               |                        |        |
| 1                      | ST1102              | 986.4828             | 986.4739  | 245 | 252      | YVYVEGEK                  |                     | 101000.5      | 125                    | 100    |
|                        |                     | 1247.6993            | 1247.6899 | 763 | 772      | NQFEKIELVK                |                     |               |                        |        |
|                        |                     | 1702.9374            | 1702.9274 | 748 | 762      | EQALLYTHTIVSTVK           |                     |               |                        |        |
| 2                      | ST1664              | 813.4141             | 813.4384  | 248 | 254      | FDGVTFK                   |                     | 50604.6       | 78                     | 99.995 |
|                        |                     | 922.488              | 922.4826  | 395 | 402      | LGETLFDK                  |                     |               |                        |        |
|                        |                     | 1386.7052            | 1386.7366 | 243 | 254      | YPGQKFDGVTFK              |                     |               |                        |        |
|                        |                     | 1432.726             | 1432.7186 | 383 | 394      | TYVAVAVWQGK               |                     |               |                        |        |
| 3                      | ST1164              | 1057.6152            | 1057.6132 | 391 | 399      | VLWVTNLGR                 |                     | 57105         | 33                     | 100    |
|                        |                     | 1606.8588            | 1606.8655 | 444 | 458      | LPDLQIPPSYPGGPR           |                     |               |                        |        |
|                        |                     | 1663.7533            | 1663.8298 | 224 | 239      | GMGYGAIYAFNATDGR          |                     |               |                        |        |
|                        |                     | 1864.0076            | 1864.0186 | 442 | 458      | TRLPDLQIPPSYPGGPR         |                     |               |                        |        |
| 4                      | ST1074              | 1625.8394            | 1625.8385 | 212 | 226      | ALQNaNAPHFVTSQK           |                     | 50564.8       | 40                     | 68.404 |
| 5                      | SSO0389             | 1178.5986            | 1178.5918 | 232 | 242      | MLPGTNYAVGR               |                     | 131785.1      | 266                    | 100    |
|                        |                     | 1194.5935            | 1194.579  | 232 | 242      | MLPGTNYAVGR               | Oxidation (M)[1]    |               |                        |        |
|                        |                     | 1276.6896            | 1276.6729 | 186 | 197      | YNNLASLPVGTK              |                     |               |                        |        |
|                        |                     | 1469.8038            | 1469.7871 | 569 | 581      | AYVALPSFYTLPK             |                     |               |                        |        |
|                        |                     | 1631.9003            | 1631.886  | 217 | 231      | LVGELLNPLYTANSK           |                     |               |                        |        |
|                        |                     | 2093.0073            | 2093.0076 | 136 | 154      | ELAYSYEQSIGVTPSASYK       |                     |               |                        |        |
|                        |                     | 2845.4617            | 2845.488  | 453 | 478      | SGSNYLLYGSVYEAEKPLGSTQLQK |                     |               |                        |        |
| 6                      | SSO2619             | 960.4645             | 960.4641  | 318 | 325      | YGLSHNNR                  |                     | 80367         | 330                    | 100    |
|                        |                     | 1327.7831            | 1327.7612 | 278 | 290      | SVGPSLSEIVLVK             |                     |               |                        |        |
|                        |                     | 1439.7603            | 1439.74   | 204 | 215      | IMEYPYQAVVVK              |                     |               |                        |        |
|                        |                     | 1455.7552            | 1455.7371 | 204 | 215      | IMEYPYQAVVVK              | Oxidation (M)[2]    |               |                        |        |
|                        |                     | 1679.8275            | 1679.8198 | 216 | 229      | GPYEVEINTLEPYR            |                     |               |                        |        |
| 7                      | SSO0881             | 865.4777             | 865.4843  | 53  | 59       | LDVYISR                   |                     | 25020.1       | 66                     | 99.933 |
|                        |                     | 866.4553             | 866.4716  | 39  | 45       | LVMANYR                   |                     |               |                        |        |
|                        |                     | 1109.5837            | 1109.578  | 2   | 11       | ASSKVEDFVK                |                     |               |                        |        |
|                        |                     | 1198.6691            | 1198.6705 | 27  | 36       | NAFKPQQPLR                |                     |               |                        |        |
|                        |                     | 1351.6675            | 1351.6707 | 83  | 94       | AAMYANEIAEIR              |                     |               |                        |        |
|                        |                     | 1471.8114            | 1471.8142 | 185 | 197      | KILEEASVVAEQR             |                     |               |                        |        |
|                        |                     | 1754.0171            | 1754.0121 | 99  | 113      | QLITTQIALEQVQLR           |                     |               |                        |        |
| 8                      | SSO1172             | 1694.921             | 1694.9501 | 754 | 768      | EQALLYTSTIISEVK           |                     | 101417        | 71                     | 99.977 |
|                        |                     | 2684.4407            | 2684.4771 | 541 | 564      | GSLNPDQPFIVENNLGQTIIVLFR  |                     |               |                        |        |
| 9                      | SSO2847             | 1346.7791            | 1346.7726 | 196 | 207      | GAVLYVNTQLLR              |                     | 61089.9       | 44                     | 86.926 |
| 10                     | SSO2894             | 923.6287             | 923.6966  | 70  | 77       | IINPLILK                  |                     | 28301.3       | 44                     | 88.348 |

|                              |           |           |           |      |      |                         |                        |          |     |        |
|------------------------------|-----------|-----------|-----------|------|------|-------------------------|------------------------|----------|-----|--------|
|                              |           | 1105.4949 | 1105.5377 | 23   | 30   | YYEFQNNK                |                        |          |     |        |
|                              |           | 1312.726  | 1312.6984 | 31   | 42   | QGFEGVKQVLPK            | Pyro-glu (N-term Q)[1] |          |     |        |
|                              |           | 1531.8478 | 1531.7954 | 166  | 177  | FLLDELERLEVR            |                        | 79955.1  | 38  | 49.138 |
| 11                           | SSO3053   | 1187.5691 | 1187.5663 | 230  | 239  | ATETQATFYR              |                        |          |     |        |
|                              |           | 1572.842  | 1572.8439 | 555  | 568  | DLPAIPVVFDAYPR          |                        |          |     |        |
| 12                           | Saci_1038 | 1647.8053 | 1647.8009 | 631  | 645  | YGFDFGEPYAGAIK          |                        | 95339.7  | 130 | 100    |
|                              |           | 2236.1184 | 2236.1189 | 591  | 609  | QLGPNYNIPPNYFANLYVR     | Pyro-glu (N-term Q)[1] |          |     |        |
|                              |           | 2253.145  | 2253.147  | 591  | 609  | QLGPNYNIPPNYFANLYVR     |                        |          |     |        |
| 13                           | Saci_1165 | 974.5417  | 974.5441  | 124  | 132  | AGQAPIVYR               |                        | 52408.1  | 75  | 99.993 |
|                              |           | 1473.7737 | 1473.7791 | 293  | 305  | AAIIFDGPWDLQK           |                        |          |     |        |
|                              |           | 2285.25   | 2285.262  | 306  | 328  | YVSALGSDLGAAPLPIVSQTGLR |                        |          |     |        |
| 14                           | Saci_1760 | 895.4705  | 895.4656  | 184  | 190  | AIMYLER                 |                        | 85233.7  | 127 | 100    |
|                              |           | 911.4655  | 911.463   | 184  | 190  | AIMYLER                 | Oxidation (M)[3]       |          |     |        |
|                              |           | 1036.5309 | 1036.5286 | 581  | 589  | FVSLNEEAK               |                        |          |     |        |
|                              |           | 1523.7529 | 1523.7736 | 590  | 601  | TVTVTYNPPYYFR           |                        |          |     |        |
|                              |           | 1603.869  | 1603.8813 | 304  | 318  | ALNAPTLAQEIAYTK         |                        |          |     |        |
|                              |           | 1635.8304 | 1635.8568 | 210  | 222  | LTFYYTYPPETLK           |                        |          |     |        |
|                              |           | 1763.9254 | 1763.9513 | 210  | 223  | LTFYYTYPPETLKK          |                        |          |     |        |
| 15                           | Saci_0298 | 822.4104  | 822.4188  | 133  | 140  | TAVGFDGR                |                        | 31222.2  | 3   | 100    |
|                              |           | 1011.6196 | 1011.6071 | 176  | 185  | GLIISGNLPK              |                        |          |     |        |
|                              |           | 1862.8707 | 1862.8507 | 115  | 130  | HGFQQGSYGS LIYDYK       |                        |          |     |        |
| 16                           | Saci_2355 | 1214.7719 | 1214.7507 | 1065 | 1076 | LVALSTLSLVAK            |                        | 150946.2 | 62  | 99.853 |
|                              |           | 1558.7246 | 1558.7091 | 1109 | 1121 | QPFMTYSDLQFAK           |                        |          |     |        |
|                              |           | 1574.7196 | 1574.7014 | 1109 | 1121 | QPFMTYSDLQFAK           |                        |          |     |        |
|                              |           | 1575.7512 | 1575.7228 | 1109 | 1121 | QPFMTYSDLQFAK           |                        |          |     |        |
|                              |           | 1591.7461 | 1591.7274 | 1109 | 1121 | QPFMTYSDLQFAK           | Oxidation (M)[4]       |          |     |        |
|                              |           | 1787.0214 | 1787.0049 | 1282 | 1298 | LAPFQVPAQVPLPNAPK       |                        |          |     |        |
| <b>Glycosylated fraction</b> |           |           |           |      |      |                         |                        |          |     |        |
| 17                           | ST0617    | 1637.838  | 1637.8335 | 43   | 58   | ESGALDALVNLSYSAK        |                        | 41317.5  | 84  | 99.999 |
|                              |           | 1704.8479 | 1704.8483 | 259  | 274  | SSGALDAVFDATYFLK        |                        |          |     |        |
|                              |           | 1874.0129 | 1874.0203 | 336  | 352  | ITLGGLVAAFRDEDIQR       |                        |          |     |        |
|                              |           | 2025.9797 | 2025.9724 | 184  | 202  | ELNDSGALNALTDSAYMLK     |                        |          |     |        |
|                              |           | 2294.2239 | 2294.2227 | 37   | 58   | TVSQLKESGALDALVNLSYSAK  |                        |          |     |        |
| 18                           | ST0137    | 1129.6364 | 1129.6353 | 26   | 35   | IGINEAPLFR              |                        | 63371.1  | 50  | 96.983 |
|                              |           | 1140.5684 | 1140.5671 | 16   | 25   | SGFFDAILDR              |                        |          |     |        |
|                              |           | 1268.6633 | 1268.6671 | 15   | 25   | KSGFFDAILDR             |                        |          |     |        |
| 19                           | ST1304    | 947.5672  | 947.5613  | 316  | 323  | GVQLVYLR                |                        | 51775.4  | 438 | 100    |
|                              |           | 1081.5272 | 1081.5214 | 41   | 49   | YNSLETAQR               |                        |          |     |        |
|                              |           | 1186.568  | 1186.5605 | 425  | 432  | YVYNQWWK                |                        |          |     |        |
|                              |           | 1202.6263 | 1202.5563 | 62   | 72   | VLKEASNSPEK             | Deamidation (NQ)[7]    |          |     |        |
|                              |           | 1237.6284 | 1237.6289 | 40   | 49   | RYSLETAQR               |                        |          |     |        |

|    |        |           |           |     |     |                            |                                                |          |     |        |
|----|--------|-----------|-----------|-----|-----|----------------------------|------------------------------------------------|----------|-----|--------|
|    |        | 1269.6473 | 1269.645  | 50  | 60  | YEIYPAIASSR                |                                                |          |     |        |
|    |        | 1283.6412 | 1283.6578 | 433 | 442 | YKTRVEECAK                 | Carbamidomethyl (C)[8]                         |          |     |        |
|    |        | 1372.6202 | 1372.6273 | 267 | 277 | QYCSLSFLDTR                | Carbamidomethyl (C)[3], Pyro-glu (N-term Q)(1) |          |     |        |
|    |        | 1388.7096 | 1388.7039 | 243 | 254 | IYPGFTFDTVTK               |                                                |          |     |        |
|    |        | 1406.6654 | 1406.6589 | 255 | 266 | EVLSNCSEIMPK               | Carbamidomethyl (C)[6]                         |          |     |        |
|    |        | 1422.6603 | 1422.6902 | 255 | 266 | EVLSNCSEIMPK               | Carbamidomethyl (C)[6], Oxidation (M)[10]      |          |     |        |
|    |        | 1425.7485 | 1425.7473 | 50  | 61  | YEIYPAIASSRR               |                                                |          |     |        |
|    |        | 1460.7573 | 1460.7527 | 141 | 152 | TPPTWYNPPLFK               |                                                |          |     |        |
|    |        | 1595.8751 | 1595.8741 | 410 | 424 | VVDELAGKPPSITNR            |                                                |          |     |        |
|    |        | 1689.8999 | 1689.9009 | 139 | 152 | TKTPPTWYNPPLFK             |                                                |          |     |        |
|    |        | 1753.0106 | 1753.0128 | 122 | 138 | TIDDLADKGLGAIPLIK          |                                                |          |     |        |
|    |        | 1792.7914 | 1792.7787 | 342 | 357 | MMNVYDSLNSLMGASK           | Oxidation (M)[1,2]                             |          |     |        |
|    |        | 1866.9232 | 1866.9241 | 194 | 211 | ASLTYSSGGSYLISIAAR         |                                                |          |     |        |
|    |        | 1881.1055 | 1881.1104 | 121 | 138 | KTIDDLADKGLGAIPLIK         |                                                |          |     |        |
|    |        | 1932.8976 | 1932.918  | 342 | 358 | MMNVYDSLNSLMGASKR          | Oxidation (M)[1]                               |          |     |        |
|    |        | 1948.8926 | 1948.926  | 342 | 358 | MMNVYDSLNSLMGASKR          | Oxidation (M)[1,2]                             |          |     |        |
|    |        | 1955.0485 | 1955.056  | 324 | 341 | IAQPPSDLTTTAAIIEWAK        |                                                |          |     |        |
|    |        | 2225.0398 | 2225.1338 | 342 | 360 | MMNVYDSLNSLMGASKRFRK       | Deamidation (NQ)[3], Oxidation (M)[1,2]        |          |     |        |
|    |        | 2262.1433 | 2262.1472 | 405 | 424 | EMYDKVVDELAGKPPSITNR       |                                                |          |     |        |
|    |        | 2332.1567 | 2332.1663 | 41  | 60  | YNSLETAQRYEYIYPAIASSR      |                                                |          |     |        |
|    |        | 2952.4236 | 2952.4512 | 212 | 237 | NDVMRPASDTYPYIYFAYGTNPVVAK |                                                |          |     |        |
| 20 | ST2539 | 1535.8329 | 1535.824  | 346 | 359 | YQNVPAVAQPAHIK             |                                                | 76840.6  | 145 | 100    |
|    |        | 1564.7754 | 1564.7683 | 360 | 372 | YIVIDYGLSHNDR              |                                                |          |     |        |
|    |        | 2093.0701 | 2093.0691 | 327 | 345 | VTPGFSTIVLEANPNYWGK        |                                                |          |     |        |
| 21 | ST2391 | 1138.7194 | 1138.7133 | 878 | 888 | TIGVQLPILGK                |                                                | 125591.8 | 32  | 100    |
|    |        | 1286.6123 | 1286.6129 | 468 | 478 | VGSNGQNYKYR                | Deamidation (NQ)[4]                            |          |     |        |
|    |        | 1495.7328 | 1495.7249 | 146 | 158 | IWSPFNDVASGFR              |                                                |          |     |        |
|    |        | 1965.9565 | 1965.9736 | 142 | 158 | NAQRIWSPFNDVASGFR          | Deamidation (NQ)[1]                            |          |     |        |
|    |        | 2023.9867 | 2024.0085 | 550 | 565 | MLWIQMSQYVPQQLQK           | Deamidation (NQ)[5,8,12]                       |          |     |        |
|    |        | 2052.9919 | 2052.9812 | 775 | 792 | LYQLFQQNGMGSSPQAQR         |                                                |          |     |        |
|    |        | 2053.9761 | 2053.9846 | 775 | 792 | LYQLFQQNGMGSSPQAQR         | Deamidation (NQ)[3]                            |          |     |        |
|    |        | 2054.9924 | 2054.9844 | 550 | 565 | MLWIQMSQYVPQQLQK           | Deamidation (NQ)[5,8], Oxidation (M)[1,6]      |          |     |        |
|    |        | 2522.3572 | 2522.3403 | 919 | 942 | AEAVTVNPNQSVTVGNTQLPLITR   |                                                |          |     |        |
| 22 | ST1103 | 1234.6426 | 1234.6349 | 398 | 408 | GILEQAQYGQK                |                                                | 53499.1  | 36  | 30.875 |
| 23 | ST0706 | 1175.599  | 1175.5964 | 706 | 715 | AIWTVNGQMR                 |                                                | 86864.3  | 104 | 100    |
|    |        | 1285.7878 | 1285.7811 | 607 | 617 | INPLLLFLQTVK               |                                                |          |     |        |
|    |        | 1459.7428 | 1459.7367 | 78  | 90  | IDFATLDHASEIK              |                                                |          |     |        |
| 24 | ST2218 | 969.5264  | 969.5278  | 215 | 223 | WGAVGNLNR                  |                                                | 44905.7  | 197 | 100    |
|    |        | 1029.5    | 1029.4958 | 224 | 232 | ASGVYYDVR                  |                                                |          |     |        |
|    |        | 1136.6245 | 1136.5392 | 351 | 359 | LRMITPSYR                  |                                                |          |     |        |
|    |        | 1168.5303 | 1168.5258 | 263 | 271 | FEEIEQSMR                  |                                                |          |     |        |
|    |        | 1227.6328 | 1227.6292 | 279 | 289 | NIPEGNILSDR                |                                                |          |     |        |
|    |        | 1275.7056 | 1275.7039 | 151 | 162 | VTNSYIIPGGVR               |                                                |          |     |        |
|    |        | 1289.6631 | 1289.66   | 199 | 209 | DRLENVGVMTR                |                                                |          |     |        |
|    |        | 1431.8066 | 1431.7975 | 151 | 163 | VTNSYIIPGGVRR              |                                                |          |     |        |

|    |         |           |           |     |     |                            |         |     |                    |
|----|---------|-----------|-----------|-----|-----|----------------------------|---------|-----|--------------------|
|    |         | 1649.8645 | 1649.8522 | 279 | 292 | NIPEGNILSDRFFK             |         |     |                    |
|    |         | 1655.8693 | 1655.8676 | 309 | 322 | VVFPGYASFRPPR              |         |     |                    |
|    |         | 1937.9392 | 1937.9324 | 334 | 350 | GELVYVVSDGSPHPYR           |         |     |                    |
|    |         | 2275.0918 | 2275.0833 | 373 | 392 | YADLVAIYGSLDYFPPEADR       |         |     |                    |
|    |         | 2288.1848 | 2288.1904 | 233 | 251 | KIEPYAAYDKVDFEIPVYK        |         |     |                    |
| 25 | ST1883  | 1057.5636 | 1057.5608 | 12  | 20  | LTSPENIQR                  | 49471.1 | 187 | 100                |
|    |         | 1114.6354 | 1114.6337 | 24  | 33  | LVDSLPTIEK                 |         |     |                    |
|    |         | 1136.5438 | 1136.5392 | 187 | 196 | IANMTAEMQK                 |         |     |                    |
|    |         | 1137.615  | 1137.5891 | 429 | 439 | DTSYAIGALVK                |         |     |                    |
|    |         | 1168.5337 | 1168.5258 | 187 | 196 | IANMTAEMQK                 |         |     | Oxidation (M)[4,8] |
|    |         | 1210.7194 | 1210.7013 | 84  | 93  | IQAIWPLIEK                 |         |     |                    |
|    |         | 1289.7134 | 1289.66   | 34  | 44  | LMDKLGELDKK                |         |     |                    |
|    |         | 1292.645  | 1292.6443 | 187 | 197 | IANMTAEMQKR                |         |     |                    |
|    |         | 1702.9109 | 1702.8894 | 286 | 301 | VIESLDIDSLGATEK            |         |     |                    |
|    |         | 1819.9657 | 1819.9608 | 348 | 363 | LLSQVDMTSMALLER            |         |     |                    |
|    |         | 2044.1172 | 2044.139  | 99  | 117 | ALNLIQSLDVDSLLTATEK        |         |     |                    |
|    |         | 2058.1077 | 2058.1064 | 252 | 270 | AVSLLQSLDIDSLLNATER        |         |     |                    |
| 26 | ST0202  | 942.573   | 942.57    | 463 | 471 | NIAISGIVR                  | 65146.9 | 428 | 100                |
|    |         | 988.5533  | 988.5419  | 47  | 54  | RKEETIGR                   |         |     |                    |
|    |         | 1037.5374 | 1037.5281 | 199 | 207 | GYKEALSNR                  |         |     |                    |
|    |         | 1154.6205 | 1154.5984 | 422 | 430 | TIQQKFKDK                  |         |     |                    |
|    |         | 1225.5881 | 1225.5629 | 103 | 113 | EAVMLADSYAR                |         |     |                    |
|    |         | 1241.583  | 1241.5623 | 103 | 113 | EAVMLADSYAR                |         |     | Oxidation (M)[4]   |
|    |         | 1356.6616 | 1356.6289 | 332 | 343 | FTQLSTAGWSMK               |         |     |                    |
|    |         | 1372.6566 | 1372.6254 | 332 | 343 | FTQLSTAGWSMK               |         |     | Oxidation (M)[11]  |
|    |         | 1457.7634 | 1457.7339 | 224 | 236 | AYPLSPAQKPEK               |         |     |                    |
|    |         | 1472.7267 | 1472.6982 | 55  | 67  | ETKGDEAIAYTFK              |         |     |                    |
|    |         | 1498.8475 | 1498.8232 | 318 | 331 | LLDEADVILALGTR             |         |     |                    |
|    |         | 1585.8584 | 1585.8275 | 224 | 237 | AYPLSPAQKPEKK              |         |     |                    |
|    |         | 1588.8251 | 1588.8057 | 168 | 181 | TQDDLMLNILAPITK            |         |     | Oxidation (M)[6]   |
|    |         | 1618.8534 | 1618.8221 | 528 | 541 | TTSNLDIKDEILEK             |         |     |                    |
|    |         | 1620.8995 | 1620.87   | 431 | 444 | IFIDLTAPTIDFVR             |         |     |                    |
|    |         | 1643.8024 | 1643.7816 | 346 | 360 | GYLIHNNVDGEDIGK            |         |     |                    |
|    |         | 1698.9425 | 1698.9205 | 222 | 236 | LKAYPLSPAQKPEK             |         |     |                    |
|    |         | 1734.9174 | 1734.8945 | 208 | 221 | NRPVYIEIAEDLFR             |         |     |                    |
|    |         | 1769.9181 | 1769.8978 | 88  | 102 | LKQYEININYASSAR            |         |     |                    |
|    |         | 1782.9061 | 1782.8756 | 73  | 87  | EIFSPYNLPSFLAER            |         |     |                    |
|    |         | 1827.0375 | 1827.0242 | 222 | 237 | LKAYPLSPAQKPEKK            |         |     |                    |
|    |         | 1918.9657 | 1918.953  | 344 | 360 | FKGYLIHNNVDGEDIGK          |         |     |                    |
|    |         | 1977.0341 | 1977.0234 | 405 | 421 | IHILDSHGGLWPYDVVR          |         |     |                    |
|    |         | 2105.1292 | 2105.1169 | 404 | 421 | KIHILDSHGGLWPYDVVR         |         |     |                    |
|    |         | 2155.1545 | 2155.1514 | 445 | 462 | LHIEKPFWSIAESLLER          |         |     |                    |
|    |         | 2194.2554 | 2194.2585 | 477 | 496 | IIGVTDLQQVLIQNLIIQNR       |         |     |                    |
|    |         | 2498.2673 | 2498.29   | 293 | 317 | GVIPASHPLYAGEGLGFATEEGGR   |         |     |                    |
|    |         | 2713.3943 | 2713.468  | 291 | 317 | SKGVIPASHPLYAGEGLGFATEEGGR |         |     |                    |
| 27 | SSO1273 | 1105.5272 | 1105.524  | 602 | 612 | AAWSEGAAQSK                | 97896.9 | 171 | 100                |
|    |         | 1214.5874 | 1214.5828 | 664 | 674 | AGYEAAINFMK                |         |     |                    |

|    |         |           |           |     |     |                        |                         |     |        |
|----|---------|-----------|-----------|-----|-----|------------------------|-------------------------|-----|--------|
|    |         | 1230.5823 | 1230.5786 | 664 | 674 | AGYEAAINFMK            |                         |     |        |
|    |         | 1531.7792 | 1531.7842 | 210 | 221 | EYAQYFITQLQK           |                         |     |        |
|    |         | 1573.8696 | 1573.8671 | 222 | 235 | LGFTVQQIQGNLQK         |                         |     |        |
|    |         | 1687.8802 | 1687.8853 | 209 | 221 | REYAQYFITQLQK          |                         |     |        |
|    |         | 2480.2761 | 2480.2561 | 183 | 202 | YINGQWYYNGKPITVYVFE    |                         |     |        |
| 28 | SSO2619 | 960.4645  | 960.464   | 318 | 325 | YGLSHNNR               | 80367                   | 157 | 100    |
|    |         | 1327.7831 | 1327.7732 | 278 | 290 | SVGPSLSEIVLVK          |                         |     |        |
|    |         | 1439.7603 | 1439.7487 | 204 | 215 | IMEYPYQAVVVK           |                         |     |        |
|    |         | 1455.7552 | 1455.7433 | 204 | 215 | IMEYPYQAVVVK           |                         |     |        |
|    |         | 1679.8275 | 1679.8221 | 216 | 229 | GPYEVEINTLEPYR         |                         |     |        |
|    |         |           |           |     |     |                        | Oxidation (M)[2]        |     |        |
| 29 | SSO3053 | 1187.5691 | 1187.5609 | 230 | 239 | ATETQATFYR             | 79955.1                 | 72  | 99.983 |
|    |         | 1348.642  | 1348.6333 | 150 | 160 | DVVATYQDYFK            |                         |     |        |
|    |         | 1391.7715 | 1391.7515 | 543 | 554 | QIYNNMAAILIK           |                         |     |        |
|    |         | 1572.842  | 1572.8303 | 555 | 568 | DLPAIPVVFDAYPR         |                         |     |        |
|    |         | 1738.8395 | 1738.8269 | 272 | 289 | GIAQWGGTGSTGSPFSK      |                         |     |        |
| 30 | SSO2847 | 1346.7791 | 1346.777  | 196 | 207 | GAVLYVNTQLLR           | 61089.9                 | 88  | 100    |
|    |         | 2156.0439 | 2156.0391 | 98  | 118 | QYAGLQMQTYSIPGAGGTNAK  |                         |     |        |
| 31 | SSO0282 | 956.5522  | 956.5503  | 190 | 198 | AVAQVAELR              | 60330.2                 | 122 | 100    |
|    |         | 1071.5066 | 1071.5873 | 477 | 485 | SLHENETNK              |                         |     |        |
|    |         | 1083.5251 | 1083.5071 | 268 | 276 | INDPTQMHK              |                         |     |        |
|    |         | 1129.6212 | 1129.6113 | 402 | 412 | DALGTVADVIR            |                         |     |        |
|    |         | 1143.6732 | 1143.6515 | 517 | 527 | AATEAVTLVLR            |                         |     |        |
|    |         | 1263.6467 | 1263.6364 | 277 | 286 | FLEEEENILK             |                         |     |        |
|    |         | 1343.6953 | 1343.6675 | 305 | 316 | GIDEVAQHYLAK           |                         |     |        |
|    |         | 1344.7303 | 1344.6769 | 292 | 304 | IAATGANVVICQK          |                         |     |        |
|    |         | 1356.7522 | 1356.7277 | 127 | 138 | EIHPTIIVSGYK           |                         |     |        |
|    |         | 1356.7522 | 1356.7277 | 127 | 138 | EIHPTIIVSGYK           |                         |     |        |
|    |         | 1440.8168 | 1440.803  | 416 | 430 | AVAGGGAVEIEIAKR        |                         |     |        |
|    |         | 1440.842  | 1440.803  | 36  | 49  | ANIAAVKAIEEALK         |                         |     |        |
|    |         | 1471.7903 | 1471.7576 | 305 | 317 | GIDEVAQHYLAKK          |                         |     |        |
|    |         | 1900.9763 | 1900.9257 | 215 | 232 | HGGSVNDTQLVYGIVVDK     |                         |     |        |
|    |         | 2026.0815 | 2026.0735 | 147 | 164 | TIQEIAQPVTINDTDVLR     |                         |     |        |
|    |         | 2154.1765 | 2154.1753 | 147 | 165 | TIQEIAQPVTINDTDVLRK    |                         |     |        |
|    |         | 2224.207  | 2224.2031 | 248 | 267 | IALLDASLEVEKPELDAEIR   |                         |     |        |
|    |         | 2435.23   | 2435.2454 | 341 | 362 | VISNIDELTSQDLGYAALVEER |                         |     |        |
|    |         |           |           |     |     |                        | Carbamidomethyl (C)[11] |     |        |
| 32 | SSO0862 | 974.5629  | 974.5386  | 321 | 328 | VKRSDIEK               | 59638.3                 | 101 | 100    |
|    |         | 1109.6062 | 1109.5969 | 395 | 404 | SINDALHALR             |                         |     |        |
|    |         | 1210.7155 | 1210.6993 | 131 | 141 | ALELLPQLGTR            |                         |     |        |
|    |         | 1307.5532 | 1307.5369 | 383 | 394 | GSNDMALDEAER           |                         |     |        |
|    |         | 1327.7004 | 1327.6753 | 301 | 312 | GIDDIAQHFLAK           |                         |     |        |
|    |         | 1429.8009 | 1429.8011 | 324 | 336 | SDIEKLEKALGAR          |                         |     |        |
|    |         | 1646.9047 | 1646.8973 | 223 | 237 | GLVLDKEVVHPGMPR        |                         |     |        |
|    |         | 1742.9688 | 1742.9448 | 491 | 505 | IVDDVYALNIEPIR         |                         |     |        |
|    |         | 1806.8392 | 1806.8182 | 343 | 358 | DATPEDLGYAELVEER       |                         |     |        |
|    |         | 1896.0687 | 1896.0671 | 244 | 261 | IAVLDAALEVEKPEISAK     |                         |     |        |

|    |         |           |           |     |     |                           |          |     |                        |
|----|---------|-----------|-----------|-----|-----|---------------------------|----------|-----|------------------------|
|    |         | 1901.0637 | 1900.9257 | 1   | 18  | MAAPVLLLKEGTSRRTTGR       |          |     |                        |
|    |         | 2154.144  | 2154.1753 | 107 | 125 | AESLLDQNIHPTIIIIEGYK      |          |     |                        |
| 33 | SSO3000 | 1013.5302 | 1013.5191 | 358 | 365 | YLFIQSDK                  | 59235.5  | 63  | 99.846                 |
|    |         | 1071.6045 | 1071.5873 | 255 | 264 | LGISDPTQIK                |          |     |                        |
|    |         | 1136.5695 | 1136.5642 | 387 | 396 | SLNDAFNSIR                |          |     |                        |
|    |         | 1238.6052 | 1238.5991 | 162 | 171 | FFSTEHTLEK                |          |     |                        |
|    |         | 1269.7637 | 1269.6859 | 347 | 357 | LVEVRNLGKNK               |          |     |                        |
|    |         | 1286.6263 | 1286.6075 | 265 | 275 | GYLDEQTAYVK               |          |     |                        |
|    |         | 1429.8121 | 1429.8011 | 313 | 324 | NVKRSDIELLSR              |          |     |                        |
| 34 | SSO1119 | 1098.6405 | 1098.6293 | 24  | 33  | IVDALPTIEK                | 46431    | 196 | 100                    |
|    |         | 1179.5925 | 1179.5787 | 34  | 43  | VTDKITEMDK                |          |     |                        |
|    |         | 1179.5925 | 1179.5787 | 34  | 43  | VTDKITEMDK                |          |     |                        |
|    |         | 1210.7194 | 1210.693  | 84  | 93  | IQAIWPILEK                |          |     |                        |
|    |         | 1244.5649 | 1244.542  | 187 | 197 | FASLMDQMSSK               |          |     |                        |
|    |         | 1260.5599 | 1260.5403 | 187 | 197 | FASLMDQMSSK               |          |     | Oxidation (M)[5]       |
|    |         | 1307.6875 | 1307.6598 | 34  | 44  | VTDKITEMDKK               |          |     |                        |
|    |         | 1802.0092 | 1801.9702 | 317 | 332 | IISQIDVNSLLMLTNK          |          |     |                        |
|    |         | 1811.891  | 1811.8683 | 133 | 148 | VIDQIDYDSLIDSTSK          |          |     |                        |
|    |         | 1875.9884 | 1875.9701 | 220 | 236 | ADLINTLISFGMDQLPK         |          |     |                        |
|    |         | 2041.0521 | 2041.0348 | 393 | 411 | ATSDKDVSIALGLMLELAK       |          |     | Oxidation (M)[14]      |
|    |         | 2072.1484 | 2072.1272 | 99  | 117 | ALQLLSQIDIDSTLTALEK       |          |     |                        |
|    |         | 2080.1121 | 2080.1011 | 374 | 392 | AWVNDIPNARPVGTMGLLR       |          |     |                        |
|    |         | 2096.1069 | 2096.1018 | 374 | 392 | AWVNDIPNARPVGTMGLLR       |          |     | Oxidation (M)[15]      |
|    |         | 2807.457  | 2807.3208 | 252 | 276 | TLNLIQSLDLDSMFNALEALTPIMK |          |     | Oxidation (M)[13]      |
| 35 | SSO2632 | 1070.5841 | 1070.5763 | 350 | 358 | LLSDPEIQR                 | 42203.1  | 201 | 100                    |
|    |         | 1074.667  | 1074.6562 | 359 | 368 | GLGVIFTVIR                |          |     |                        |
|    |         | 1115.6418 | 1115.6256 | 177 | 186 | SSVINDLLVR                |          |     |                        |
|    |         | 1225.6245 | 1225.6121 | 224 | 233 | YISNSLEIMR                |          |     |                        |
|    |         | 1241.6195 | 1241.5995 | 224 | 233 | YISNSLEIMR                |          |     | Oxidation (M)[9]       |
|    |         | 1461.7002 | 1461.6792 | 211 | 223 | DMLNDEAIQSLGR             |          |     |                        |
|    |         | 1477.6951 | 1477.677  | 211 | 223 | DMLNDEAIQSLGR             |          |     | Oxidation (M)[2]       |
|    |         | 1635.8588 | 1635.8357 | 46  | 61  | ESGALDAIVNSAYVVK          |          |     |                        |
|    |         | 1788.8955 | 1788.88   | 308 | 322 | ALDFFEIAFSNVPYR           |          |     |                        |
|    |         | 1881.9124 | 1881.9049 | 208 | 223 | TFRDMLNDEAIQSLGR          |          |     | Oxidation (M)[5]       |
|    |         | 2154.0933 | 2154.1091 | 117 | 135 | MLKEDGTLDVLINMAYTAR       |          |     |                        |
|    |         | 2169.0745 | 2169.1033 | 224 | 241 | YISNSLEIMREIDDETLK        |          |     |                        |
|    |         | 2219.1917 | 2219.199  | 41  | 61  | VNELKESGALDAIVNSAYVVK     |          |     |                        |
| 36 | SSO2427 | 963.4893  | 963.4899  | 64  | 71  | IEEFGNVR                  | 20084.5  | 63  | 99.86                  |
|    |         | 1091.5844 | 1091.5875 | 64  | 72  | IEEFGNVRK                 |          |     |                        |
|    |         | 1216.5785 | 1216.5745 | 44  | 53  | QFGPYVYGFR                |          |     | Pyro-glu (N-term Q)[1] |
|    |         | 1233.6051 | 1233.6039 | 44  | 53  | QFGPYVYGFR                |          |     |                        |
|    |         | 1838.8629 | 1838.9283 | 5   | 18  | EEKDIFDLMDEWIR            |          |     |                        |
| 37 | SSO0389 | 1178.5986 | 1178.5962 | 232 | 242 | MLPGTNYAVGR               | 131785.1 | 193 | 100                    |
|    |         | 1194.5935 | 1194.5876 | 232 | 242 | MLPGTNYAVGR               |          |     | Oxidation (M)[1]       |
|    |         | 1469.8038 | 1469.8015 | 569 | 581 | AYVALPSFYTLPK             |          |     |                        |

|    |           |           |           |      |      |                            |                                          |          |     |        |
|----|-----------|-----------|-----------|------|------|----------------------------|------------------------------------------|----------|-----|--------|
|    |           | 1631.9003 | 1631.895  | 217  | 231  | LVGELLNPLYTANSK            |                                          |          |     |        |
|    |           | 2093.0073 | 2093.0173 | 136  | 154  | ELAYSYEQSIGVTPSASYK        |                                          |          |     |        |
|    |           | 2845.4617 | 2845.5229 | 453  | 478  | SGSNYLLYGSVYEAELKPLGSTQLQK |                                          |          |     |        |
| 38 | SSO0999   | 825.41    | 825.1177  | 4    | 10   | SDKFSNK                    |                                          | 53249.1  | 82  | 99.998 |
|    |           | 1087.6259 | 1087.6278 | 362  | 370  | FLLSPQVQR                  |                                          |          |     |        |
|    |           | 1365.7313 | 1365.7255 | 178  | 188  | VYHGTYFIPLR                |                                          |          |     |        |
|    |           | 1385.7423 | 1385.7356 | 349  | 361  | GATHIDALIEFAK              |                                          |          |     |        |
|    |           | 1424.6804 | 1424.6764 | 399  | 410  | AEEEEALQNAFFR              |                                          |          |     |        |
|    |           | 1620.9108 | 1620.8975 | 90   | 103  | IIPQFEATHPNIK              |                                          |          |     |        |
| 39 | SSO1171   | 974.5417  | 974.5438  | 139  | 147  | AGQAPIVYR                  |                                          | 56820    | 34  | 69.786 |
| 40 | Saci_2355 | 1214.7719 | 1214.7635 | 1065 | 1076 | LVALSTLSLVAK               |                                          | 150946.2 | 90  | 100    |
|    |           | 1558.7246 | 1558.725  | 1109 | 1121 | QPFMTYSDLQFAK              | Pyro-glu (N-term Q)[1]                   |          |     |        |
|    |           | 1574.7196 | 1574.7247 | 1109 | 1121 | QPFMTYSDLQFAK              | Oxidation (M)[4], Pyro-glu (N-term Q)[1] |          |     |        |
|    |           | 1575.7512 | 1575.7397 | 1109 | 1121 | QPFMTYSDLQFAK              |                                          |          |     |        |
|    |           | 1591.7461 | 1591.7482 | 1109 | 1121 | QPFMTYSDLQFAK              | Oxidation (M)[4]                         |          |     |        |
|    |           | 1592.7875 | 1592.7825 | 88   | 103  | TENAQTGATTGSVTVR           |                                          |          |     |        |
|    |           | 1787.0214 | 1787.0188 | 1282 | 1298 | LAPFQVPAQVPLPNAPK          |                                          |          |     |        |
|    |           | 2568.3191 | 2568.3372 | 388  | 411  | LVVEYPSSTNFLPQGVTV         |                                          |          |     |        |
| 41 | Saci_1749 | 1080.6047 | 1080.6129 | 207  | 215  | LIPQDPELR                  |                                          | 33750.9  | 73  | 99.989 |
|    |           | 1236.7059 | 1236.7037 | 207  | 216  | LIPQDPELRR                 |                                          |          |     |        |
|    |           | 1249.6423 | 1249.6428 | 222  | 232  | DLGIEVYDAVR                |                                          |          |     |        |
|    |           | 2154.1343 | 2154.1587 | 127  | 145  | VSNPGLLVNTNIQFASQYFR       |                                          |          |     |        |
| 42 | Saci_1760 | 911.4655  | 911.4617  | 184  | 190  | AIMYLER                    | Oxidation (M)[3]                         | 85233.7  | 144 | 100    |
|    |           | 1036.5309 | 1036.5288 | 581  | 589  | FVSLNEEAK                  |                                          |          |     |        |
|    |           | 1523.7529 | 1523.7526 | 590  | 601  | TVTVTYNPPYFR               |                                          |          |     |        |
|    |           | 1603.869  | 1603.8669 | 304  | 318  | ALNAPTLAQEIAYTK            |                                          |          |     |        |
|    |           | 1635.8304 | 1635.8346 | 210  | 222  | LTFYYTYPPETLK              |                                          |          |     |        |
|    |           | 1763.9254 | 1763.9259 | 210  | 223  | LTFYYTYPPETLKK             |                                          |          |     |        |
|    |           | 2171.1033 | 2171.1135 | 191  | 209  | VPGITHVNGQWYYNGQPLK        |                                          |          |     |        |
| 43 | Saci_1038 | 949.489   | 949.4917  | 155  | 162  | NPTAPFFR                   |                                          | 95339.7  | 40  | 80.187 |
|    |           | 1647.8053 | 1647.8123 | 631  | 645  | YGFDFGEPYAGAIK             |                                          |          |     |        |
|    |           | 2253.145  | 2253.1431 | 591  | 609  | QLGPNYNIPPNYFANLYVR        |                                          |          |     |        |
|    |           | 2319.0862 | 2319.0833 | 163  | 183  | AGETAYFYAGFLQPPTGQNMR      |                                          |          |     |        |
| 44 | Saci_1165 | 974.5417  | 974.5441  | 124  | 132  | AGQAPIVYR                  |                                          | 52408.1  | 75  | 99.993 |
|    |           | 1473.7737 | 1473.7791 | 293  | 305  | AAIIFDGPWDLQK              |                                          |          |     |        |
|    |           | 2285.25   | 2285.262  | 306  | 328  | YVSALGSDLGAAPLPIVSQTGLR    |                                          |          |     |        |

| LC-MS | Calc. Mass (dalton) | Obsrv. Mass (dalton) | Start | End | Sequence | Modification | Protein MW (dalton) | Protein Score | Protein Score C.I. (%) |
|-------|---------------------|----------------------|-------|-----|----------|--------------|---------------------|---------------|------------------------|
|-------|---------------------|----------------------|-------|-----|----------|--------------|---------------------|---------------|------------------------|

|    |        |           |           |      |      |                            |          |     |                      |
|----|--------|-----------|-----------|------|------|----------------------------|----------|-----|----------------------|
| 45 | ST1664 | 813.4141  | 813.4349  | 248  | 254  | FDGVTFK                    | 50604.6  | 604 | 100                  |
|    |        | 922.488   | 922.4777  | 395  | 402  | LGETLFDK                   |          |     |                      |
|    |        | 1364.6627 | 1364.6705 | 235  | 247  | DGMNIGGKYPGQK              |          |     |                      |
|    |        | 1380.6576 | 1380.699  | 235  | 247  | DGMNIGGKYPGQK              |          |     | Oxidation (M)[3]     |
|    |        | 1386.7052 | 1386.709  | 243  | 254  | YPGQKFDGVTFK               |          |     |                      |
|    |        | 1432.726  | 1432.7231 | 383  | 394  | TYVAVAFVWQGK               |          |     |                      |
|    |        | 1595.835  | 1595.8455 | 130  | 143  | QIMLTPGTTYIEK              |          |     |                      |
|    |        | 1696.8259 | 1696.8192 | 220  | 234  | VAMMWYMGSVIPPSK            |          |     |                      |
|    |        | 1712.8209 | 1712.8142 | 220  | 234  | VAMMWYMGSVIPPSK            |          |     | Oxidation (M)[3]     |
|    |        | 1728.8158 | 1728.8588 | 220  | 234  | VAMMWYMGSVIPPSK            |          |     | Oxidation (M)[3,4]   |
|    |        | 1744.8107 | 1744.814  | 220  | 234  | VAMMWYMGSVIPPSK            |          |     | Oxidation (M)[3,4,7] |
|    |        | 2159.0588 | 2159.1001 | 235  | 254  | DGMNIGGKYPGQKFDGVTFK       |          |     |                      |
|    |        | 2469.1797 | 2469.187  | 220  | 242  | VAMMWYMGSVIPPSKDGMMNIGGK   |          |     |                      |
| 46 | ST2391 | 908.4373  | 908.4289  | 994  | 1000 | YWVNNGR                    | 125591.8 | 376 | 100                  |
|    |        | 952.5322  | 952.5232  | 630  | 637  | LAQTINHR                   |          |     |                      |
|    |        | 987.541   | 987.5326  | 1099 | 1106 | WAWANIVK                   |          |     |                      |
|    |        | 1078.6255 | 1078.624  | 18   | 27   | VPLPPVTAER                 |          |     |                      |
|    |        | 1138.7194 | 1138.7242 | 878  | 888  | TIGVQLPILGK                |          |     |                      |
|    |        | 1495.7328 | 1495.7214 | 146  | 158  | IWSPFNDVASGFR              |          |     |                      |
|    |        | 1618.8257 | 1618.8335 | 566  | 580  | QGMTVNGPNIAEFIK            |          |     |                      |
|    |        | 2021.0348 | 2021.0306 | 550  | 565  | MLWIQMSQYVPQQLQK           |          |     |                      |
|    |        | 2522.3572 | 2522.3838 | 919  | 942  | AEAVTVNPNQSVTVGNTQLPLITR   |          |     |                      |
| 47 | ST1102 | 986.4828  | 986.4747  | 245  | 252  | YVYVEGEK                   | 101000.5 | 215 | 100                  |
|    |        | 1247.6993 | 1247.7061 | 763  | 772  | NQFEKIELVK                 |          |     |                      |
|    |        | 1316.6957 | 1316.7051 | 675  | 685  | TEIWQNVSLAR                |          |     |                      |
|    |        | 1702.9374 | 1702.9559 | 748  | 762  | EQALLYTHTIVSTVK            |          |     |                      |
| 48 | ST1164 | 978.5002  | 978.496   | 216  | 223  | GQYDQIVR                   | 57105    | 156 | 99.999               |
|    |        | 1057.6152 | 1057.6174 | 391  | 399  | VLWVTNLGR                  |          |     |                      |
|    |        | 1172.6133 | 1172.6165 | 486  | 495  | IITMYVGGGR                 |          |     |                      |
|    |        | 1606.8588 | 1606.8763 | 444  | 458  | LPDLQIPPSYPPGGR            |          |     |                      |
| 49 | ST1004 | 951.5661  | 951.5637  | 44   | 51   | AINVIFFK                   | 53029.3  | 156 | 100                  |
|    |        | 1314.6324 | 1314.6261 | 231  | 242  | EGYSQASGIQFK               |          |     |                      |
|    |        | 1720.9996 | 1720.9944 | 93   | 107  | IPLSSLTIAEHWIK             |          |     |                      |
| 50 | ST2626 | 830.4366  | 830.4337  | 391  | 397  | EIDLGQR                    | 80845.2  | 148 | 100                  |
|    |        | 1852.9327 | 1852.9561 | 366  | 382  | VGNGEETYIPTISTPFK          |          |     |                      |
|    |        | 2831.4138 | 2831.467  | 338  | 363  | ALLPFGLDTAEASDNLFTTPYQGVYK |          |     |                      |
| 51 | ST0706 | 869.4437  | 869.431   | 186  | 192  | AVMYLEK                    | 86864.3  | 142 | 100                  |
|    |        | 1175.599  | 1175.5675 | 706  | 715  | AIWTVNGQMR                 |          |     |                      |
|    |        | 1285.7878 | 1285.7843 | 607  | 617  | INPLLLFLQTVK               |          |     |                      |
|    |        | 1459.7428 | 1459.7496 | 78   | 90   | IDFATLDHASEIK              |          |     |                      |
| 52 | ST2611 | 1061.5527 | 1061.5491 | 87   | 94   | WLSPPQFR                   | 66401.1  | 106 | 100                  |
|    |        | 1488.8308 | 1488.8315 | 185  | 198  | YVLGIVGIDSLDPK             |          |     |                      |
|    |        | 1816.8944 | 1816.9017 | 138  | 151  | AFNTYINIIYYPPFK            |          |     |                      |



|    |         |                                                                            |                                                                            |                                        |                                        |                                                                                                       |          |     |        |
|----|---------|----------------------------------------------------------------------------|----------------------------------------------------------------------------|----------------------------------------|----------------------------------------|-------------------------------------------------------------------------------------------------------|----------|-----|--------|
| 53 | ST1074  | 1243.6317<br>1625.8394                                                     | 1243.6006<br>1625.8531                                                     | 311<br>212                             | 321<br>226                             | SFNITLYSNGK<br>ALQNaNAPHFVTSQK                                                                        | 50564.8  | 102 | 100    |
| 54 | ST2539  | 1535.8329<br>2093.0701                                                     | 1535.8446<br>2093.0796                                                     | 346<br>327                             | 359<br>345                             | YQNVPAVAQPAHIK<br>VTPGFSTIVLEANPNYWGK                                                                 | 76840.6  | 100 | 99.998 |
| 55 | ST1658  | 924.5261<br>1554.6755                                                      | 924.5165<br>1554.6825                                                      | 286<br>143                             | 293<br>155                             | IAVIHDTR<br>MFYGYGMAFDPQK                                                                             | 98810.4  | 90  | 99.997 |
| 56 | ST1599  | 2349.1145                                                                  | 2349.1533                                                                  | 178                                    | 197                                    | VEGETYRPPAANPNYVEEWK                                                                                  | 29530.6  | 85  | 100    |
| 57 | ST2615  | 1227.662<br>1694.8595                                                      | 1227.5962<br>1694.8735                                                     | 826<br>226                             | 835<br>241                             | VSTLEQFYLK<br>YDTVVVVTNVEGASNVK                                                                       | 117951.2 | 82  | 100    |
| 58 | ST1237  | 1315.6852<br>1351.6675<br>1361.6842<br>1443.7802                           | 1315.684<br>1351.6793<br>1361.7024<br>1443.8013                            | 184<br>81<br>69<br>183                 | 195<br>92<br>80<br>195                 | ILEEASAVAEQR<br>AAMYANEIAEIR<br>VVEAQMNKDTAR<br>KILEEASAVAEQR                                         | 24772.1  | 62  | 98.357 |
| 59 | ST2195  | 1898.8959                                                                  | 1898.8969                                                                  | 916                                    | 931                                    | YISTDYAVFHYFASSK                                                                                      | 156398.6 | 43  | 99.979 |
| 60 | ST1600  | 2034.127                                                                   | 2034.1691                                                                  | 61                                     | 79                                     | STPLIGNYPFVINSGLTK                                                                                    | 22880.2  | 32  | 99.732 |
| 61 | ST2593  | 1641.8053<br>1954.9983                                                     | 1641.8289<br>1954.9938                                                     | 109<br>92                              | 123<br>108                             | APVVGQESWLACPER<br>AAWTYVDGVPYIIDMK                                                                   | 45562.8  | 30  | 89.073 |
| 62 | ST0652  | 1680.9207                                                                  | 1680.9125                                                                  | 70                                     | 84                                     | LASDVVEYGILNFIK                                                                                       | 31409.3  | 28  | 99.299 |
| 63 | ST2523  | 818.4981<br>1130.584<br>1239.6521<br>1457.8223                             | 818.4381<br>1130.5662<br>1239.6058<br>1457.7911                            | 162<br>26<br>114<br>327                | 168<br>35<br>122<br>338                | TSIKIEK<br>GSKSYNAIYK<br>EYVIYHFIR<br>QRPNYILVGEIR                                                    | 58484    | 20  | 62.888 |
| 64 | ST0168  | 1337.6517                                                                  | 1337.6467                                                                  | 118                                    | 129                                    | AAMYANEVAEIR                                                                                          | 28042.8  | 20  | 95.548 |
| 65 | ST0237  | 960.5294<br>1657.9635                                                      | 960.4623<br>1657.809                                                       | 425<br>344                             | 433<br>359                             | VVQIGGTMR<br>LKSVDGIIVLPGFGSR                                                                         | 59200.6  | 20  | 82.237 |
| 66 | ST0589  | 1036.5098                                                                  | 1036.5353                                                                  | 121                                    | 129                                    | GVIDFDWGK                                                                                             | 34634.3  | 19  | 95.164 |
| 67 | ST0147  | 853.3793<br>1407.8259                                                      | 853.4031<br>1407.7178                                                      | 534<br>500                             | 540<br>510                             | EGIEMMK<br>WIAFALYRVLR                                                                                | 70586.4  | 19  | 70.316 |
| 68 | SSO0389 | 1178.5986<br>1194.5935<br>1276.6896<br>1469.8038<br>1631.9003<br>2072.1313 | 1178.5946<br>1194.6011<br>1276.6976<br>1469.8077<br>1631.8961<br>2072.1355 | 232<br>232<br>186<br>569<br>217<br>198 | 242<br>242<br>197<br>581<br>231<br>216 | MLPGTNYAVGR<br>MLPGTNYAVGR<br>YNNLASLPVGTK<br>AYVALPSFYTLPK<br>LVGELLNPLYTANSK<br>LEFTYAGVTYIIAVSPTVK | 131785.1 | 526 | 100    |

|    |           |           |           |     |     |                               |         |     |                  |
|----|-----------|-----------|-----------|-----|-----|-------------------------------|---------|-----|------------------|
|    |           | 2093.0073 | 2093.0479 | 136 | 154 | ELAYSYEQSIGVTPSASYK           |         |     |                  |
|    |           | 2845.4617 | 2845.4839 | 453 | 478 | SGSNYLLYGSVYEAELKPLGSTQLQK    |         |     |                  |
| 69 | SSO2619   | 960.4645  | 960.465   | 318 | 325 | YGLSHNNR                      | 80367   | 359 | 100              |
|    |           | 1327.7831 | 1327.782  | 278 | 290 | SVGPSLSEIVLVK                 |         |     |                  |
|    |           | 1439.7603 | 1439.7839 | 204 | 215 | IMEYPYQAVVVK                  |         |     |                  |
|    |           | 1455.7552 | 1455.7767 | 204 | 215 | IMEYPYQAVVVK                  |         |     |                  |
|    |           | 1679.8275 | 1679.8286 | 216 | 229 | GPYEVEINTLEPYR                |         |     | Oxidation (M)[2] |
|    |           | 3100.5698 | 3100.5264 | 204 | 229 | IMEYPYQAVVVKGPYEVEINTLEPYR    |         |     |                  |
|    |           | 3383.8308 | 3383.8772 | 477 | 506 | QLGTLTIYALAPVNELEQEQLTIQESLQK |         |     |                  |
|    |           | 3449.7971 | 3449.8545 | 596 | 623 | VYQILYQQAPYAWLPNPVYYYFVQPYYK  |         |     |                  |
| 70 | SSO0999   | 1087.6259 | 1087.629  | 362 | 370 | FLLSPQVQR                     | 53249.1 | 301 | 100              |
|    |           | 1365.7313 | 1365.7305 | 178 | 188 | VYHGTYFIPLR                   |         |     |                  |
|    |           | 1385.7423 | 1385.7384 | 349 | 361 | GATHIDALIEFAK                 |         |     |                  |
|    |           | 1424.6804 | 1424.6804 | 399 | 410 | AEEEEALQNAFFR                 |         |     |                  |
|    |           | 1620.9108 | 1620.9346 | 90  | 103 | IIIPQFEATHPNIK                |         |     |                  |
| 71 | SSO1273   | 1214.5874 | 1214.5852 | 664 | 674 | AGYEAAINFMK                   | 97896.9 | 221 | 100              |
|    |           | 1531.7792 | 1531.7766 | 210 | 221 | EYAQYFITQLQK                  |         |     |                  |
|    |           | 1573.8696 | 1573.8503 | 222 | 235 | LGFTVQQIQGNLQK                |         |     |                  |
|    |           | 1687.8802 | 1687.8866 | 209 | 221 | REYAQYFITQLQK                 |         |     |                  |
| 72 | SSO1172   | 891.4934  | 891.4903  | 769 | 775 | QQFDLIK                       | 101417  | 147 | 100              |
|    |           | 1694.921  | 1694.9491 | 754 | 768 | EQALLYTSTIIEVK                |         |     |                  |
|    |           | 2684.4407 | 2684.4771 | 541 | 564 | GSLNPDQPFIVENNLGQTIIVLFR      |         |     |                  |
| 73 | SSO2801   | 922.488   | 922.478   | 403 | 410 | LGETLFDK                      | 52498.8 | 75  | 99.876           |
|    |           | 1432.726  | 1432.7257 | 391 | 402 | TYVAVAVWQGK                   |         |     |                  |
|    |           | 1664.8539 | 1664.8695 | 228 | 242 | AAIMWYMGSVIPPTK               |         |     |                  |
| 74 | SSO3053   | 1572.842  | 1572.8674 | 555 | 568 | DLPAIPVVFDAYPR                | 79955.1 | 53  | 99.998           |
| 75 | SSO0379   | 956.4723  | 956.4609  | 295 | 302 | YPFSLSDK                      | 53578   | 46  | 99.988           |
| 76 | SSO0881   | 1480.7682 | 1480.7738 | 202 | 214 | FPELPSFVTSTQK                 | 25020.1 | 36  | 99.9             |
| 77 | SSO3043   | 1082.5994 | 1082.5966 | 317 | 325 | WPLSDPVLR                     | 79083.2 | 31  | 99.644           |
| 78 | SSO1354   | 1766.8683 | 1766.8726 | 146 | 160 | KPWDTAYAGNIFPMR               | 37271.6 | 24  | 98.114           |
| 79 | Saci_1858 | 922.488   | 922.4816  | 394 | 401 | LGETLFDK                      | 50697.6 | 417 | 100              |
|    |           | 1400.6844 | 1400.6868 | 242 | 253 | YPGQQFDGITFK                  |         |     |                  |
|    |           | 1460.7321 | 1460.7461 | 382 | 393 | TYVAVAVWQGR                   |         |     |                  |
|    |           | 1493.7821 | 1493.7816 | 220 | 233 | AAIMWYLGSGVPTK                |         |     |                  |
|    |           | 1610.8094 | 1610.8203 | 130 | 143 | MIELTPGTTYSLER                |         |     |                  |
|    |           | 1626.8043 | 1626.8247 | 130 | 143 | MIELTPGTTYSLER                |         |     | Oxidation (M)[1] |
|    |           | 2324.1414 | 2324.1667 | 220 | 241 | AAIMWYLGSGVPTKDDMNIGGK        |         |     |                  |
| 80 | Saci_1760 | 895.4705  | 895.4606  | 184 | 190 | AIMYLER                       | 85233.7 | 228 | 100              |

|    |           |           |           |      |      |                         |                        |          |     |        |
|----|-----------|-----------|-----------|------|------|-------------------------|------------------------|----------|-----|--------|
|    |           | 1036.5309 | 1036.5217 | 581  | 589  | FVSLNEEAK               |                        |          |     |        |
|    |           | 1523.7529 | 1523.7606 | 590  | 601  | TVTVTYNPYFR             |                        |          |     |        |
|    |           | 1603.869  | 1603.8794 | 304  | 318  | ALNAPTLAQEIAYTK         |                        |          |     |        |
| 81 | Saci_1038 | 949.489   | 949.478   | 155  | 162  | NPTAPFFR                |                        | 95339.7  | 196 | 100    |
|    |           | 1647.8053 | 1647.8262 | 631  | 645  | YGFDFGEPYAGAIK          |                        |          |     |        |
|    |           | 2236.1184 | 2236.1067 | 591  | 609  | QLGPNYNIPPNYFANLYVR     | Pyro-glu (N-term Q)[0] |          |     |        |
|    |           | 2253.145  | 2253.1335 | 591  | 609  | QLGPNYNIPPNYFANLYVR     |                        |          |     |        |
|    |           | 2498.1697 | 2498.1729 | 342  | 363  | SGLYFADGSPITAYDWWYSMVR  |                        |          |     |        |
| 82 | Saci_2355 | 1575.7512 | 1575.7697 | 1109 | 1121 | QPFMTYSDLQFAK           |                        | 150946.2 | 112 | 100    |
| 83 | Saci_1165 | 974.5417  | 974.5302  | 124  | 132  | AGQAPIVYR               |                        | 52408.1  | 97  | 100    |
|    |           | 2285.25   | 2285.2869 | 306  | 328  | YVSALGSDLGAAPLPIVSQTGLR |                        |          |     |        |
| 84 | Saci_1272 | 1902.0847 | 1902.0951 | 79   | 95   | LLDGQVLLPVFVNYGR        |                        | 30392.9  | 93  | 100    |
|    |           | 1945.9039 | 1945.9172 | 203  | 219  | WALNQPGTNSEAQTDWK       |                        |          |     |        |
| 85 | Saci_1416 | 1179.5641 | 1179.5557 | 172  | 182  | VDFATSSPEAR             |                        | 24836.1  | 63  | 99.611 |
|    |           | 1351.6675 | 1351.666  | 81   | 92   | AAMYANEIAEIR            |                        |          |     |        |
|    |           | 1429.7645 | 1429.7731 | 183  | 195  | KILDEASAVAEQR           |                        |          |     |        |
| 86 | Saci_1140 | 969.5151  | 969.5105  | 139  | 146  | VVSSQFFR                |                        | 55718.6  | 32  | 97.381 |
|    |           | 1333.7109 | 1333.7102 | 326  | 337  | GYAVINNVIEK             |                        |          |     |        |
| 87 | Saci_2117 | 1493.7958 | 1493.7816 | 504  | 518  | TITVGGSAVYEA AVR        |                        | 80171.5  | 24  | 98.928 |
| 88 | Saci_1737 | 1392.6287 | 1392.6371 | 57   | 67   | VMYQDYSSMLR             |                        | 56599.9  | 21  | 97.446 |
| 89 | Saci_1743 | 1394.7573 | 1394.7382 | 130  | 140  | ETIKFMNRAIR             | Oxidation (M)[6]       | 55634.3  | 21  | 95.663 |
|    |           | 1475.8217 | 1475.7468 | 423  | 435  | ILINNSGYEALR            |                        |          |     |        |
|    |           | 1759.9159 | 1759.9474 | 474  | 487  | WLMERGEERKLA EIR        |                        |          |     |        |
| 90 | Saci_0207 | 1214.7103 | 1214.7152 | 13   | 23   | LSEVIGEA IKR            |                        | 35811.7  | 20  | 97.075 |
